# Supplementary material for: An in situ polymerized polypyrrole/halloysite nanotube–silver nanoflower based flexible wearable pressure sensor with a large measurement range and high sensitivity
Source: Royal Society of Chemistry journal article supplement (doi:10.1039/d1tc03135j), 2021-01-01
Supplement: d1tc03135j1.pdf [file d1tc03135j1.pdf]

## **Supporting Information**

### **In situ polymerized polypyrrole/halloysite nanotubes-silver nanoflowers based wearable pressure sensor with large measurement range and high sensitivity**

**Chen Du, Yong Zhang\*, Dongzhi Zhang\*, Bao Zhang, Wenhao Zhao**

College of Control Science and Engineering, China University of Petroleum (East  
China), Qingdao 266580, China

\*Corresponding author: Yong Zhang, Dongzhi Zhang

E-mail address: paul\_zhangyong@163.com, dzzhang@upc.edu.cn

Tel: +86-532-86982928

Fax: +86-532-86981335

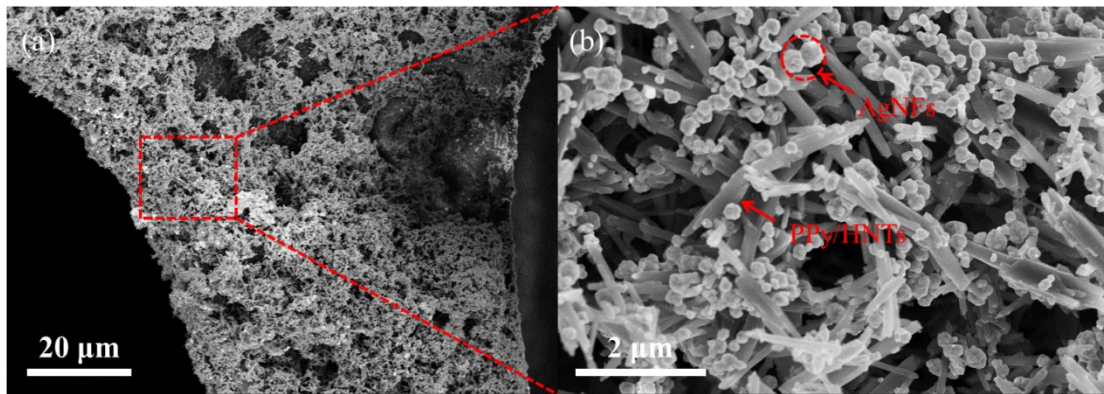

**Figure S1.** SEM images of PPy/HNT/AgNFs sponge.

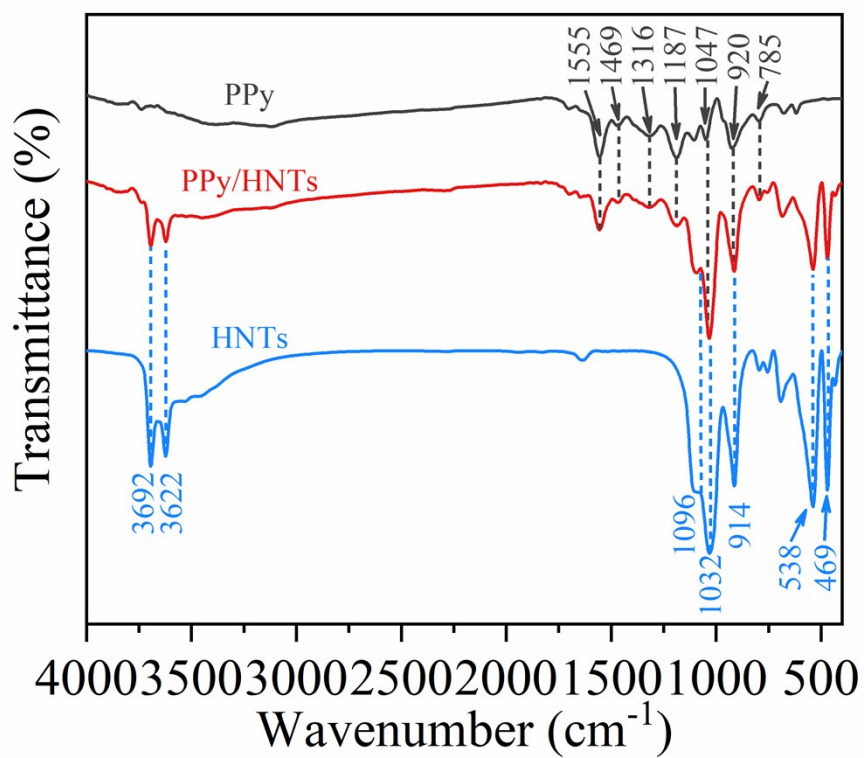

**Figure S2.** FTIR spectra of PPy, HNTs and PPy/HNTs.

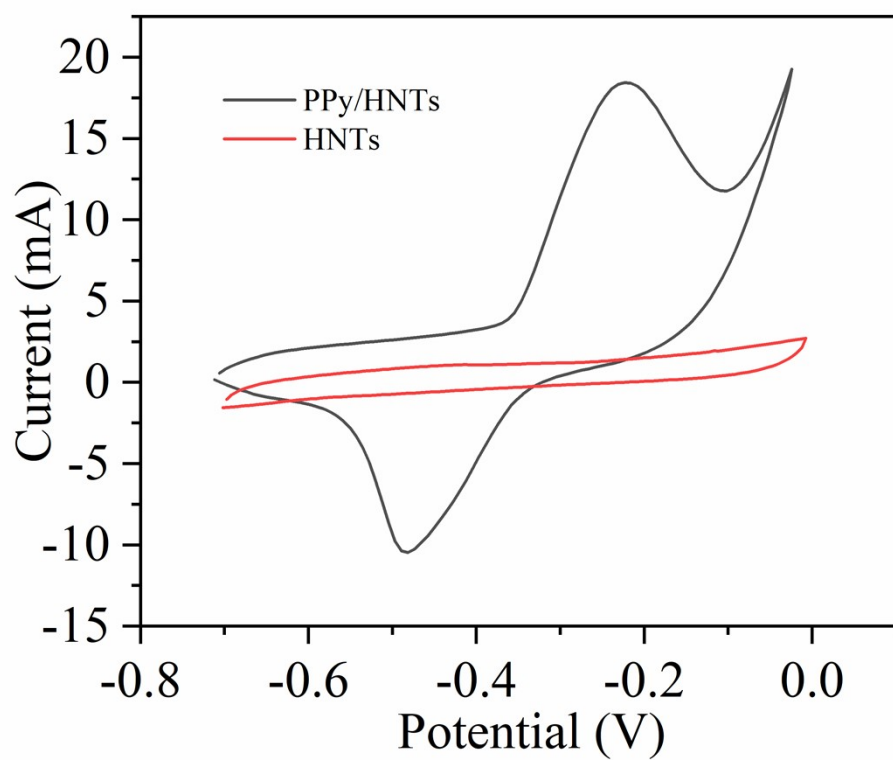

**Figure S3.** CV curves of PPy/HNTs and HNTs.

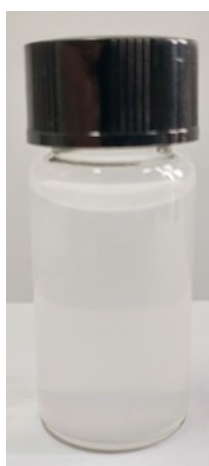

HNTs

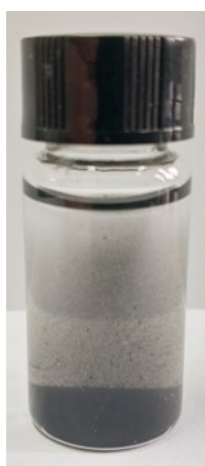

PPy

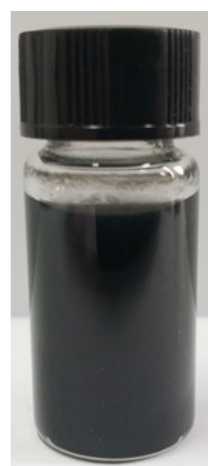

PPy/HNTs

**Figure S4.** Optical images of HNTs, PPy and PPy/HNTs solution.

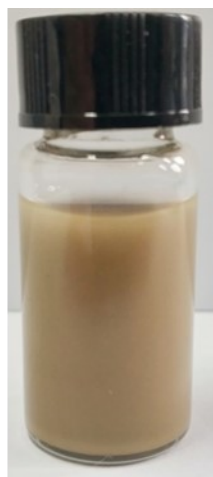

As prepared

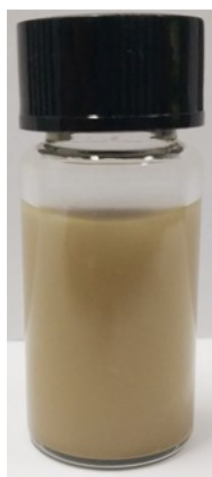

After 1 month

**Figure S5.** Optical images of Ag NF solution

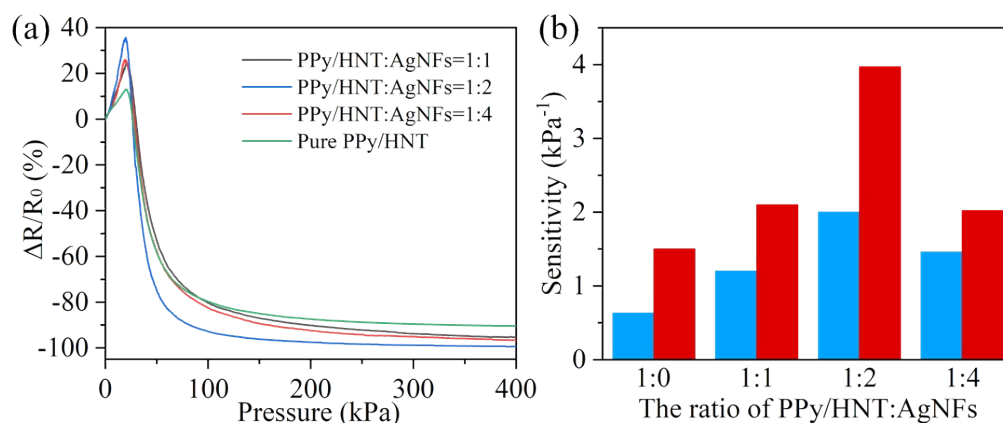

**Figure S6.** (a) The effect of the ratio of PPy/HNT and AgNFs on the sensing performance of pressure sensors from 0 kPa to 400 kPa. (b) The sensing response comparison of different PHAP pressure sensors.

The resistance value of the PPy@PU sensor obtained by immersing the PU sponge in the PPy solution was too high. This is due to the very poor dispersion of the self-polymerized PPy in water (Fig. S4), which prevents the formation of a complete conductive network on the PU sponge. Therefore, we only show the sensing performance of PPy/HNTs and AgNFs in different ratios (Fig. S6).
